# Supplementary material
Source: PubMed Central journal article supplement (PMC5419693)
Supplement: NIHMS820521-supplement.pdf [file NIHMS820521-supplement.pdf]

# Supplemental Information

## S1 Data Filtering

**Filtering of the MDS annotation from Chen et al. “The Architecture of a Scrambled Genome Reveals Massive Levels of Genomic Rearrangement during Development” *Cell*, 158-5, (2014) 1187-1198.**

If the intervals  $[a, a']$  and  $[b, b']$  in a MIC DNA sequence correspond to the MDS annotations  $M$  and  $M'$  respectively, then  $M$  and  $M'$  are *intersecting* if  $[a, a']$  intersects  $[b, b']$  and *adjacent* if  $b = a' + 1$  or  $a = b' + 1$ .

The dataset  $\mathcal{D}$  is filtered from Chen et al. (2014) in the following way:

Step 1. Merge any two MDS annotations that are consecutive in a MAC contig and overlap or are adjacent in a MIC contig.

Step 2. Remove any two MDS annotations that are non-consecutive in a MAC contig and overlap or are adjacent in a MIC contig.

Step 3. Remove all duplicate MDSs, e.g., MDSs that correspond to MAC contigs that produced from alternative MIC processing.

Three processed files are included at [http://knot.math.usf.edu/data/scrambled\\_patterns/](http://knot.math.usf.edu/data/scrambled_patterns/).

1. `processed_annotation_of_oxy_tri.gff` contains all of the processed data  $\mathcal{D}$ .
2. `list_of_DOWs_related_to_MICMAC_maps.txt` contains all rearrangement maps, corresponding double occurrence words, and the reduced double occurrence words.
3. `result_of_repeatreturn_pattern_application.txt` contains the list of all 176 words that stabilize to non-empty words after performing the iterative repeat/return removal.

## S2 Extended Table of Rearrangement Patterns

Reduced Rearrangement Patterns occurring in *O. trifallax*

| Count | Reduced MIC pattern representative                                        |
|-------|---------------------------------------------------------------------------|
| 854   | $M_1\overline{M}_2$                                                       |
| 307   | $M_2M_1$                                                                  |
| 79    | $M_1M_3M_2$                                                               |
| 35    | $M_1M_3M_2M_4$                                                            |
| 34    | $M_1M_3\overline{M}_2$                                                    |
| 27    | $M_1\overline{M}_2M_3$                                                    |
| 24    | $M_1M_3M_5M_7M_2M_4M_6M_8$                                                |
| 22    | $M_1M_3M_5M_2M_4M_6$                                                      |
| 21    | $M_1\overline{M}_3M_2$                                                    |
| 18    | $M_2M_4M_1M_3$                                                            |
| 17    | $M_3\overline{M}_2M_1$                                                    |
| 16    | $M_1M_3M_5M_2M_4$                                                         |
| 14    | $\overline{M}_1M_3M_2$                                                    |
| 14    | $\overline{M}_2M_3M_1$                                                    |
| 14    | $M_1M_3\overline{M}_4\overline{M}_2$                                      |
| 14    | $M_1M_3M_5M_7M_2M_4M_6$                                                   |
| 13    | $M_2\overline{M}_3M_1$                                                    |
| 13    | $M_3M_2\overline{M}_1$                                                    |
| 11    | $M_1M_3M_5M_7M_9M_2M_4M_6M_8$                                             |
| 11    | $M_1M_3M_5M_7M_9M_{11}M_2M_4M_6M_8M_{10}M_{12}$                           |
| 10    | $M_1M_3M_5M_7M_9M_{11}M_{13}M_2M_4M_6M_8M_{10}M_{12}$                     |
| 9     | $M_3M_2M_1$                                                               |
| 9     | $M_1M_3M_5\overline{M}_6\overline{M}_4\overline{M}_2$                     |
| 9     | $M_1M_3M_5M_7M_9M_2M_4M_6M_8M_{10}$                                       |
| 7     | $M_1M_3M_5\overline{M}_4\overline{M}_2$                                   |
| 7     | $M_1M_3M_5M_7M_9M_{11}M_{13}M_{15}M_2M_4M_6M_8M_{10}M_{12}M_{14}M_{16}$   |
| 6     | $\overline{M}_1M_2M_4M_3$                                                 |
| 6     | $M_1M_3M_5M_7M_9M_{11}M_2M_4M_6M_8M_{10}$                                 |
| 5     | $M_2M_4M_3M_1$                                                            |
| 5     | $M_3M_2M_4M_1$                                                            |
| 5     | $M_1M_3M_5M_7M_9\overline{M}_8\overline{M}_6\overline{M}_4\overline{M}_2$ |
| 5     | $M_1M_3 \dots M_{15}M_{17}M_2M_4 \dots M_{16}M_{18}$                      |
| 5     | $M_1M_3 \dots M_{19}M_{21}M_2M_4 \dots M_{18}M_{20}$                      |
| 5     | $M_1M_3 \dots M_{25}M_{27}M_2M_4 \dots M_{24}M_{26}$                      |
| 4     | $\overline{M}_1M_2M_4\overline{M}_3$                                      |
| 4     | $M_1M_3\overline{M}_2M_4$                                                 |
| 4     | $M_1\overline{M}_4\overline{M}_2M_3$                                      |
| 4     | $M_3M_5M_2M_4M_1$                                                         |

Continued on next page

| Count | Reduced MIC pattern representative                                                                                                            |
|-------|-----------------------------------------------------------------------------------------------------------------------------------------------|
| 4     | $M_1M_3M_5M_7\overline{M_8}\overline{M_6}\overline{M_4}\overline{M_2}$                                                                        |
| 4     | $M_1M_3 \dots M_{13}M_{15}M_2M_4 \dots M_{12}M_{14}$                                                                                          |
| 4     | $M_1M_3 \dots M_{19}M_{21}M_2M_4 \dots M_{20}M_{22}$                                                                                          |
| 4     | $M_1M_3 \dots M_{21}M_{23}M_2M_4 \dots M_{20}M_{22}$                                                                                          |
| 4     | $M_1M_3 \dots M_{23}M_{25}M_2M_4 \dots M_{22}M_{24}$                                                                                          |
| 3     | $M_1M_3M_5M_7\overline{M_6}\overline{M_4}\overline{M_2}$                                                                                      |
| 3     | $M_2M_4M_6\overline{M_7}\overline{M_5}\overline{M_3}M_1$                                                                                      |
| 3     | $M_1M_3M_5M_7M_9M_{11}\overline{M_{10}}\overline{M_8}\overline{M_6}\overline{M_4}\overline{M_2}$                                              |
| 3     | $M_1M_3 \dots M_{15}M_{17}M_2M_4 \dots M_{14}M_{16}$                                                                                          |
| 3     | $M_1M_3 \dots M_{27}M_{29}M_2M_4 \dots M_{28}M_{30}$                                                                                          |
| 2     | $M_1\overline{M_2}\overline{M_4}M_3$                                                                                                          |
| 2     | $M_1M_3M_5\overline{M_2}\overline{M_4}$                                                                                                       |
| 2     | $M_2M_4M_3M_5M_1$                                                                                                                             |
| 2     | $M_1\overline{M_2}M_5\overline{M_3}\overline{M_6}M_4$                                                                                         |
| 2     | $M_2M_4M_6M_1M_3M_5$                                                                                                                          |
| 2     | $M_3M_5M_2M_4M_6M_1$                                                                                                                          |
| 2     | $M_2M_1M_3\overline{M_6}\overline{M_7}M_5\overline{M_4}$                                                                                      |
| 2     | $M_2M_4M_6M_3M_5M_7M_1$                                                                                                                       |
| 2     | $M_4M_6M_2M_5M_7\overline{M_3}\overline{M_1}$                                                                                                 |
| 2     | $M_2M_4M_6M_8M_1M_3M_5M_7$                                                                                                                    |
| 2     | $M_2M_6M_8M_4M_7M_9\overline{M_5}\overline{M_3}\overline{M_1}$                                                                                |
| 2     | $M_1M_3M_5M_7M_9M_{11}\overline{M_{12}}\overline{M_{10}}\overline{M_8}\overline{M_6}\overline{M_4}\overline{M_2}$                             |
| 2     | $M_2M_4M_6M_8M_{10}M_{12}M_1M_3M_5M_7M_9M_{11}$                                                                                               |
| 2     | $M_1M_3M_5M_7M_9M_{11}M_{13}\overline{M_{12}}\overline{M_{10}}\overline{M_8}\overline{M_6}\overline{M_4}\overline{M_2}$                       |
| 2     | $M_1M_3 \dots M_{11}M_{13}M_2M_4 \dots M_{12}M_{14}$                                                                                          |
| 2     | $M_1M_3 \dots M_{15}M_{17}\overline{M_{18}}\overline{M_{16}} \dots \overline{M_4}\overline{M_2}$                                              |
| 2     | $M_1M_3 \dots M_{17}M_{19}M_2M_4 \dots M_{16}M_{18}$                                                                                          |
| 2     | $M_1M_3 \dots M_{17}M_{19}M_2M_4 \dots M_{18}M_{20}$                                                                                          |
| 2     | $M_1M_3M_5M_2M_4 \dots M_{20}M_{22}M_7M_9 \dots M_{21}M_{23}$                                                                                 |
| 2     | $M_1M_3 \dots M_{27}M_{29}M_2M_4 \dots M_{26}M_{28}$                                                                                          |
| 2     | $M_1M_3 \dots M_{29}M_{31}M_2M_4 \dots M_{28}M_{30}$                                                                                          |
| 2     | $\overline{M_1}M_3M_5 \dots M_{19}M_{21}\overline{M_{37}}\overline{M_{35}} \dots \overline{M_{25}}\overline{M_{23}}M_2M_4 \dots M_{34}M_{36}$ |
| 2     | $M_1M_3 \dots M_{37}M_{39} \dots M_2M_4 \dots M_{38}M_{40}$                                                                                   |
| 273   | Other                                                                                                                                         |

Table 1: Reduced scrambled rearrangement patterns of *O. trifallax* listed in order of frequency.

| DOW                        | Reduced Pattern            | Count                      | DOW                        | Reduced Pattern            | Count |
|----------------------------|----------------------------|----------------------------|----------------------------|----------------------------|-------|
| 123213                     | $M_1\bar{M}_4\bar{M}_2M_3$ | 4                          | 123231                     | $M_2M_4M_3M_1$             | 5     |
|                            | $M_1M_3\bar{M}_2M_4$       | 4                          |                            | $M_1\bar{M}_4M_3\bar{M}_2$ | 1     |
|                            | $\bar{M}_2M_4M_3M_1$       | 1                          |                            | $M_2M_4M_3\bar{M}_1$       | 1     |
|                            | $\bar{M}_2\bar{M}_4M_3M_1$ | 1                          |                            | $M_2\bar{M}_4M_3M_1$       | 1     |
|                            | $M_1\bar{M}_3M_4M_2$       | 1                          |                            | $M_3M_1M_4M_2$             | 1     |
|                            | $\bar{M}_3M_2M_4M_1$       | 1                          |                            | $M_1M_4M_3\bar{M}_2$       | 0     |
|                            | $M_1M_4M_3M_2$             | 0                          |                            | $M_1\bar{M}_3M_4\bar{M}_2$ | 0     |
|                            | $\bar{M}_1M_4M_3M_2$       | 0                          |                            | $\bar{M}_1M_4\bar{M}_3M_2$ | 0     |
|                            | $M_1\bar{M}_4M_3M_2$       | 0                          |                            | $M_2\bar{M}_3M_4M_1$       | 0     |
|                            | $\bar{M}_1\bar{M}_4M_3M_2$ | 0                          |                            | $\bar{M}_2M_4M_1\bar{M}_3$ | 0     |
|                            | $\bar{M}_1M_4\bar{M}_2M_3$ | 0                          | $M_3M_1\bar{M}_4M_2$       | 0                          |       |
|                            | $M_1\bar{M}_3\bar{M}_4M_2$ | 0                          | 123123                     | $M_1M_3M_2M_4$             | 35    |
|                            | $M_2M_4M_1\bar{M}_3$       | 0                          |                            | $M_2M_4M_1M_3$             | 18    |
|                            | $M_3M_1M_4\bar{M}_2$       | 0                          |                            | $M_3M_2M_4M_1$             | 5     |
|                            | $M_2M_4\bar{M}_1\bar{M}_3$ | 0                          |                            | $M_3M_2\bar{M}_4M_1$       | 1     |
|                            | $M_2\bar{M}_4M_1\bar{M}_3$ | 0                          |                            | $M_1M_4\bar{M}_2\bar{M}_3$ | 1     |
|                            | $M_4M_2\bar{M}_3M_1$       | 0                          |                            | $M_1M_3M_2\bar{M}_4$       | 0     |
|                            | $M_1M_3\bar{M}_2\bar{M}_4$ | 0                          |                            | $\bar{M}_1M_3M_2\bar{M}_4$ | 0     |
|                            | $M_1\bar{M}_3M_2\bar{M}_4$ | 0                          |                            | $M_2M_4\bar{M}_1M_3$       | 0     |
|                            | $M_1M_4\bar{M}_2M_3$       | 0                          |                            | $M_2\bar{M}_4\bar{M}_1M_3$ | 0     |
| $M_1\bar{M}_2\bar{M}_4M_3$ | 2                          | $M_3M_2M_4\bar{M}_1$       |                            | 0                          |       |
| $\bar{M}_1M_4M_2\bar{M}_3$ | 1                          | 122313                     | $M_2M_1M_4\bar{M}_3$       | 1                          |       |
| $M_2M_1M_4M_3$             | 1                          |                            | $M_2\bar{M}_1M_4\bar{M}_3$ | 1                          |       |
| $M_1M_4M_2\bar{M}_3$       | 0                          |                            | $M_3\bar{M}_4M_2M_1$       | 1                          |       |
| $\bar{M}_3M_4M_2M_1$       | 0                          |                            | $M_1M_4\bar{M}_3M_2$       | 0                          |       |
| $M_1\bar{M}_2M_4M_3$       | 0                          |                            | $M_1\bar{M}_2M_4\bar{M}_3$ | 0                          |       |
| $\bar{M}_1\bar{M}_2M_4M_3$ | 0                          |                            | $\bar{M}_1M_4\bar{M}_3M_2$ | 0                          |       |
| $M_3\bar{M}_2M_4M_1$       | 0                          | 121233                     | $\bar{M}_1M_2M_4M_3$       | 6                          |       |
| $M_1\bar{M}_4M_2\bar{M}_3$ | 0                          |                            | $\bar{M}_1M_2\bar{M}_4M_3$ | 0                          |       |
| $\bar{M}_1\bar{M}_2M_4M_3$ | 0                          |                            | $M_4M_3\bar{M}_2M_1$       | 0                          |       |
| $M_1\bar{M}_2\bar{M}_4M_3$ | 0                          | $M_1\bar{M}_2M_3\bar{M}_4$ | 0                          |                            |       |
| $M_1\bar{M}_2\bar{M}_3M_4$ | 0                          | 123321                     | $M_1M_3\bar{M}_4\bar{M}_2$ | 14                         |       |
| $M_4M_3M_2\bar{M}_1$       | 0                          |                            | $M_2M_4\bar{M}_3M_1$       | 1                          |       |
| $M_4M_3M_2M_1$             | 0                          | 123312                     | $M_1M_3\bar{M}_4M_2$       | 1                          |       |
| 122133                     | $\bar{M}_1M_2M_4\bar{M}_3$ | 4                          | 122331                     | $\bar{M}_2M_1M_4\bar{M}_3$ | 0     |

Table 2: The number of reduced patterns having four MDSs observed in *O. trifallax*, grouped by their associated double occurrence word.

### S3 Nested Repeat-Return Removal Algorithm

---

```
1: Get DOW from the contig and store it in  $RDOW$  variable
2: Remove all loops from  $RDOW$ 
3: Put  $RDOW$  in the ascending order
4: repeat
5:    $prevWord \leftarrow RDOW$ 
6:    $ListOfSets_1 \leftarrow empty\ list, ListOfSets_2 \leftarrow empty\ list$ 
7:    $i \leftarrow 1$ 
8:   while  $i < length(RDOW)$  do
9:     if  $RDOW[i + 1] = RDOW[i] + 1$  then
10:       $letterSet \leftarrow \{RDOW[i]\}$ 
11:       $i \leftarrow i + 1$ 
12:       $letterSet \leftarrow letterSet \cup \{RDOW[i]\}$ 
13:      while  $RDOW[i + 1] = RDOW[i] + 1$  do
14:         $i \leftarrow i + 1$ 
15:         $letterSet \leftarrow letterSet \cup \{RDOW[i]\}$ 
16:      end while
17:      Add  $letterSet$  to  $ListOfSets_1$ 
18:     else if  $RDOW[i + 1] = RDOW[i] - 1$  then
19:        $letterSet \leftarrow \{RDOW[i]\}$ 
20:        $i \leftarrow i + 1$ 
21:        $letterSet \leftarrow letterSet \cup \{RDOW[i]\}$ 
22:       while  $RDOW[i + 1] = RDOW[i] - 1$  do
23:          $i \leftarrow i + 1$ 
24:          $letterSet \leftarrow letterSet \cup \{RDOW[i]\}$ 
25:       end while
26:       Add  $letterSet$  to  $ListOfSets_2$ 
27:     end if
28:      $i \leftarrow i + 1$ 
29:   end while
30:    $intersection_1 \leftarrow \emptyset, intersection_2 \leftarrow \emptyset$ 
31:   for all  $letterSet_i, letterSet_j$  in  $ListOfSets_1$  with  $i \neq j$  do
32:     if  $|letterSet_i \cap letterSet_j| \geq 2$  then
33:        $intersection_1 \leftarrow intersection_1 \cup (letterSet_i \cap letterSet_j)$ 
34:     end if
35:   end for
36:   for all  $letterSet_i$  in  $ListOfSets_1$  and  $letterSet_j$  in  $ListOfSets_2$  do
37:     if  $|letterSet_i \cap letterSet_j| \geq 2$  then
38:        $intersection_2 \leftarrow intersection_2 \cup (letterSet_i \cap letterSet_j)$ 
39:     end if
40:   end for
41:    $lettersToRemove \leftarrow intersection_1 \cup intersection_2$ 
42:   for all letter  $a$  in  $RDOW$  do
```

```
43:     if  $a$  is in  $lettersToRemove$  then
44:         Remove  $a$  from  $RDOW$ 
45:     end if
46: end for
47: Remove all loops from  $RDOW$ 
48: Put  $RDOW$  in the ascending order
49: until  $prevWord = RDOW$  or  $RDOW = empty\ word$ 
```

---

## S4 Proof that the S3 Algorithm Removes Maximal Repeat-Return Words

Let  $w = a_1 a_2 \cdots a_{2n}$  be an assembly word. Note that  $w$  may be represented uniquely as  $w = uv$  where  $u$  is a maximal sequence of the form

$$i(i+1) \cdots (i+j-1) \text{ or } i(i-1) \cdots (i-j+1) \quad (\star)$$

for some  $i, j \in [n]$  and  $v$  is a word. Consider the recursive construction where  $w_0 = w$  and  $w_{k-1} = u_k w_k$  where  $u_k$  is the maximal length sequence defined above  $(\star)$ , and  $w_k$  is eventually an empty set. This results in a finite set  $\{u_1, \dots, u_p\}$ . Define the binary operation  $\wedge$  such that, given two words  $x$  and  $y$ ,

$$x \wedge y = \begin{cases} \{a \mid a \in x, a \in y\}, & x \text{ and } y \text{ have at least two letters in common} \\ \emptyset, & \text{otherwise} \end{cases}$$

and the set

$$R = \bigcup_{k, l \in [p], k \neq l} (u_k \wedge u_l).$$

**Claim 1.**  $R$  is the set of letters that form all maximal sub-repeats and sub-returns of  $w$ .

*Proof.* Let  $x \in R$ , then  $\exists u_i, u_j$ , such that  $x \in u_i \wedge u_j$ , and we note that  $u_i \wedge u_j$  consists of consecutive symbols that correspond to a sub-repeat/sub-return of  $w$ . Hence,  $x$  is a part of some maximal sub-repeat/sub-return of  $w$ .

Let  $x$  be a letter of some maximal sub-repeat/sub-return  $v$  of  $w$ , then there is a letter  $y \in v$  such that  $y$  is next to  $x$  in  $v$ . So,  $y = x + 1$ , or  $y = x - 1$  and WLOG assume  $y = x + 1$ . Consider the first occurrence of  $v$  inside  $w$ . We claim that  $x$  and  $y$  belong to the same  $u_k$ . Assume otherwise, then we have  $x \in u_k$  and  $y \in u_{k+1}$ . Since  $y = x + 1$ , then  $u_k$  can not be a singleton. Also,  $u_k$  can not be of the form  $i(i+1) \cdots (x-1)x$ , since otherwise  $u_k$  can be extended by appending  $y = (x+1)$  to  $u_k$ , but  $u_k$  is maximal. So,  $x$  can only belong to  $u_k$  of the form  $(i)(i-1) \cdots (x+1)x$ . Hence,  $x+1 = y \in u_k$ , and we also have that  $y \in u_{k+1}$ , so  $y$  already appears twice in  $w$  and there is yet another occurrence of  $y$  in  $w$ . Thus,  $x$  and  $y$  belong to the same  $u_k$  during the first occurrence of  $v$  inside  $w$ . For the second occurrence of  $v$  inside  $w$ , we have that either  $x$  is before  $y$  (i.e.  $v$  is a sub-repeat), or  $y$  is before  $x$  (i.e.  $v$  is a sub-return). If  $x$  is before  $y$ , then the similar argument shows that  $x$  and  $y$  belong to the same  $u_l$ . Assume that  $y$  is before  $x$  and  $y \in u_l$ ,  $x \in u_{l+1}$ . Then, since  $y = x + 1$ , we have that  $u_l$  can not be a singleton. Also,  $u_l$  can not be of the form  $i(i-1) \cdots (y+1)y$ , since otherwise  $u_l$  can be extended by appending  $x = y - 1$  to  $u_l$ , but  $u_l$  is maximal. Thus,  $u_l$  can only be of the form  $i(i+1) \cdots (y-1)y$ . Hence,  $y-1 = x \in u_l$ , and  $x \in u_{l+1}$ , so  $x$  appears twice in  $w$  as a letter of  $u_l$  and  $u_{l+1}$ . Also,  $x \in u_k$  (which is disjoint from  $u_l$ ), so  $x$  appears 3 times in  $w$ . Therefore,  $x$  and  $y$  belong to the same  $u_l$ , so  $x \in u_k \wedge u_l \neq \emptyset$ , since there are at least two letters ( $x$  and  $y$ ) in  $u_k$  and  $u_l \Rightarrow x \in R$ .  $\square$
